# Supplementary material
Source: PubMed Central journal article supplement (PMC6443080)
Supplement: NIHMS81524-supplement-Supplementary_Data.pdf [file NIHMS81524-supplement-Supplementary_Data.pdf]

## Range-expansion effects on the belowground plant microbiome

KS Ramirez et al.

### Supplementary Data:

1. OTU tables (otuTables\_Ramirez.zip)
2. Environmental Factors by sample (SoilFactors\_Ramirez.txt)

### Supplementary Table 1: Collection of belowground plant microbiome samples from 382 plant individuals across Europe (Greece, Montenegro, Slovenia, Austria, Germany and the Netherlands).

Summary of 11 plant species and sample number. *C. stoebe* and *R. austriaca* originated from Central and Eastern Europe, while all other range-expanders originated from southern Europe.

| Plant Type   | Plant Species                | Life Stage       | AMF association | Total Sample # |
|--------------|------------------------------|------------------|-----------------|----------------|
| Native       | <i>Centaurea jacea</i>       | perennial        | yes             | 27             |
| Native       | <i>Geranium molle</i>        | annual           | yes             | 53             |
| Native       | <i>Rorippa sylvestris</i>    | perennial        | no              | 30             |
| Native       | <i>Tragopogon pratensis</i>  | perennial        | yes             | 60             |
| Related RE   | <i>Centaurea stoebe</i>      | perennial        | yes             | 24             |
| Related RE   | <i>Geranium pyrenaicum</i>   | perennial        | yes             | 54             |
| Related RE   | <i>Rorippa austriaca</i>     | perennial        | no              | 12             |
| Related RE   | <i>Tragopogon dubius</i>     | annual           | yes             | 45             |
| Unrelated RE | <i>Lactuca serriola</i>      | annual/bi-annual | yes             | 54             |
| Unrelated RE | <i>Dittrichia graveolens</i> | annual           | yes             | 48             |
| Unrelated RE | <i>Rapistrum rugosum</i>     | annual           | no              | 24             |

**Supplementary Table 2:** Plant species had the strongest effect on community composition, yet no factor was particularly strong in predicting composition, as determined by the PERMANOVA model which included plant species, plant type, pH, Nitrogen, Carbon and Latitude.

|                   | Plant Species            | Plant Type               | pH                        | Nitrogen                  | Carbon | Latitude |
|-------------------|--------------------------|--------------------------|---------------------------|---------------------------|--------|----------|
| Rhizosphere - ITS | R <sup>2</sup> = 0.14*** | ns                       | R <sup>2</sup> = 0.05***  | R <sup>2</sup> = 0.004**  | ns     | ns       |
| Soil-ITS          | R <sup>2</sup> = 0.07*** | R <sup>2</sup> = 0.01*** | R <sup>2</sup> = 0.005*** | ns                        | ns     | ns       |
| Rhizosphere – 16S | R <sup>2</sup> = 0.08*** | R <sup>2</sup> = 0.02*** | R <sup>2</sup> = 0.01***  | R <sup>2</sup> = 0.006*** | ns     | ns       |

|          |                          |                          |                          |    |    |                           |
|----------|--------------------------|--------------------------|--------------------------|----|----|---------------------------|
| Soil-16S | R <sup>2</sup> = 0.07*** | R <sup>2</sup> = 0.02*** | R <sup>2</sup> = 0.05*** | ns | ns | R <sup>2</sup> = 0.013*** |
|----------|--------------------------|--------------------------|--------------------------|----|----|---------------------------|

**Supplementary Table 3: Relationship between community composition and latitude across the gradient of range-expansion.** Presented are the correlations between community dissimilarity and latitude for each individual species, and for each plant type (shaded rows). (P < 0.05\*; p < 0.01\*\*; p << 0.001\*\*\*)

|      | Plant Species        | Soil Fungi  | Rhizosphere Fungi | Soil Bacteria | Rhizosphere Bacteria |
|------|----------------------|-------------|-------------------|---------------|----------------------|
| Nat  | <i>C. jacea</i>      | -0.40 (***) | -0.001 (ns)       | -0.17 (*)     | -0.39 (***)          |
| Nat  | <i>G. molle</i>      | -0.44 (***) | -0.16 (ns)        | -0.18 (**)    | 0.01 (ns)            |
| Nat  | <i>R. sylvestris</i> | 0.19 (**)   | 0.13 (ns)         | -0.11 (ns)    | -0.22 (**)           |
| Nat  | <i>T. pratensis</i>  | -0.18 (ns)  | -0.07 (ns)        | 0.17 (*)      | 0.26 (**)            |
|      | Native               | -0.11(**)   | -0.4 (ns)         | -0.14 (***)   | -0.13 (*)            |
| ReRE | <i>C. stobe</i>      | -0.15 (ns)  | 0.12 ns*)         | -0.06 (ns)    | -0.04 (ns)           |
| ReRE | <i>G. pyrenaicum</i> | 0.12 (ns)   | 0.07 (ns)         | -0.14 (ns)    | 0.00 (ns)            |
| ReRE | <i>R. austriaca</i>  | -0.31 (**)  | -0.04 (ns)        | -0.39 (***)   | -0.29 (***)          |
| ReRE | <i>T. dubius</i>     | -0.24 (**)  | 0.41 (ns)         | 0.00 (ns)     | 0.39 (***)           |
|      | Related RE           | -0.13 (**)  | 0.34 (ns)         | -0.08 (*)     | 0.01 (*)             |
| UnRE | <i>L. serriola</i>   | 0.01 (ns)   | -0.24 (**)        | -0.19 (***)   | -0.47 (***)          |
| UnRE | <i>D. graveolens</i> | -0.02 (ns)  | -0.22 (**)        | 0.10 (ns)     | 0.12 (ns)            |
| UnRE | <i>R. rugosum</i>    | -0.40 (**)  | -0.07 (ns)        | -0.54 (***)   | -0.33 (**)           |
|      | Unrelated RE         | -0.12 (*)   | -0.05 (ns)        | -0.10 (*)     | -0.32 (***)          |

**Supplementary Table 4** Plant type had a significant effect on community composition, but there was an interaction with country for soil fungal communities. (p < 0.05\*; p < 0.01\*\*; p < 0.001\*\*\*)

|                      | Nat | Related | Unrelated | Plant Type   | Country     |
|----------------------|-----|---------|-----------|--------------|-------------|
| Rhizosphere fungi    | a   | a       | b         | F=30.878***  | ns          |
| Soil fungi           | a   | a       | b         | F=23.322***  | F=22.135*** |
| Rhizosphere bacteria | a   | a       | a         | ns           | F= 22.09*** |
| Soil bacteria        | a   | a       | b         | F = 50.09*** | ns          |

**Supplementary Table 5: Relationship between Alpha Diversity and latitude across the gradient of range-expansion.** Presented are the correlations between alpha diversity and latitude for each individual species, and for each plant type (shaded rows). ( $p < 0.05^*$ ;  $p < 0.01^{**}$ ;  $p < 0.001^{***}$ )

|      | Plant Species        | Fungal Soil | Fungal Rhizosphere | Bacteria Soil | Bacteria Rhizosphere |
|------|----------------------|-------------|--------------------|---------------|----------------------|
| Nat  | <i>C. jacea</i>      | 0.13 (ns)   | -0.35 (*)          | -0.05 (ns)    | -0.05 (ns)           |
| Nat  | <i>G. molle</i>      | 0.43 (**)   | 0.21 (ns)          | 0.18 (ns)     | 0.18 (ns)            |
| Nat  | <i>R. sylvestris</i> | 0.36 (**)   | 0.31 (*)           | -0.14 (ns)    | -0.15 (ns)           |
| Nat  | <i>T. pratensis</i>  | 0.17 (ns)   | 0.42 (*)           | -0.10 (ns)    | -0.10 (ns)           |
|      | Native               | 0.20 (*)    | 0.23 (*)           | -0.06 (ns)    | -0.09 (ns)           |
| ReRE | <i>C. stobe</i>      | 0.11 (ns)   | 0.06 (ns)          | 0.72 (***)    | 0.73 (***)           |
| ReRE | <i>G. pyrenaicum</i> | -0.22 (ns)  | -0.19 (ns)         | -0.11 (ns)    | -0.11 (ns)           |
| ReRE | <i>R. austriaca</i>  | 0.37 (ns)   | -0.24 (ns)         | -0.32 (ns)    | -0.31 (ns)           |
| ReRE | <i>T. dubius</i>     | -0.04 (ns)  | -0.58 (*)          | 0.12 (ns)     | 0.11 (ns)            |
|      | Related RE           | -0.04 (ns)  | 0.12 (ns)          | -0.05 (ns)    | 0.02 (ns)            |
| UnRE | <i>L. serriola</i>   | -0.19 (ns)  | 0.25 (ns)          | -0.14 (ns)    | -0.14 (ns)           |
| UnRE | <i>D. graveolens</i> | 0.42 (**)   | 0.24 (ns)          | -0.02 (ns)    | -0.02 (ns)           |
| UnRE | <i>R. rugosum</i>    | 0.27 (ns)   | -0.52 (*)          | -0.36 (ns)    | -0.36 (ns)           |
|      | Unrelated RE         | (ns)        | 0.36 (***)         | (ns)          | (ns)                 |

**Supplementary Table 6 Unrelated range expanders had significantly lower microbial diversity than other plant types.** Mean species richness of native, related range-expanding (RE) and unrelated range-expanding (RE) species. Significance of plant type and country determined by ANOVA.

|                       | Unrelated RE      | Related RE        | Native            | Significance-Plant Type | Country   |
|-----------------------|-------------------|-------------------|-------------------|-------------------------|-----------|
| Fungal Rhizosphere    | 308 <sup>b</sup>  | 221 <sup>a</sup>  | 226 <sup>a</sup>  | < 0.00001               | < 0.00001 |
| Fungal Soil           | 468 <sup>b</sup>  | 552 <sup>a</sup>  | 578 <sup>a</sup>  | < 0.002                 | < 0.03    |
| Bacterial Rhizosphere | 2695 <sup>b</sup> | 1230 <sup>a</sup> | 1527 <sup>a</sup> | < 0.0001                | <0.002    |
| Bacterial soil        | 4078 <sup>a</sup> | 4244 <sup>a</sup> | 4228 <sup>a</sup> | ns                      | ns        |

**Supplementary Table 7. The ratio of potential plant pathogens:symbionts and plant pathogens:AMF significantly increased from the south to the north in the rhizosphere of unrelated range expanders.**

Presented are the Pearson correlation values ( $p < 0.05^*$ ;  $p < 0.01^{**}$ ;  $p < 0.001^{***}$ )

|                           | Soil       |           |           | Rhizosphere       |           |                 |
|---------------------------|------------|-----------|-----------|-------------------|-----------|-----------------|
|                           | Unrelated  | Related   | Native    | Unrelated         | Related   | Native          |
| <b>Plant Pathogen:Sym</b> | -0.07 (ns) | 0.06 (ns) | 0.11 (ns) | <b>-0.31(***)</b> | -0.5(ns)  | 0.17(ns)        |
| <b>Plant Pathogen:AMF</b> | -0.05 (ns) | 0.04 (ns) | 0.13 (ns) | <b>-0.19 (*)</b>  | 0.06 (ns) | <b>-0.19(*)</b> |

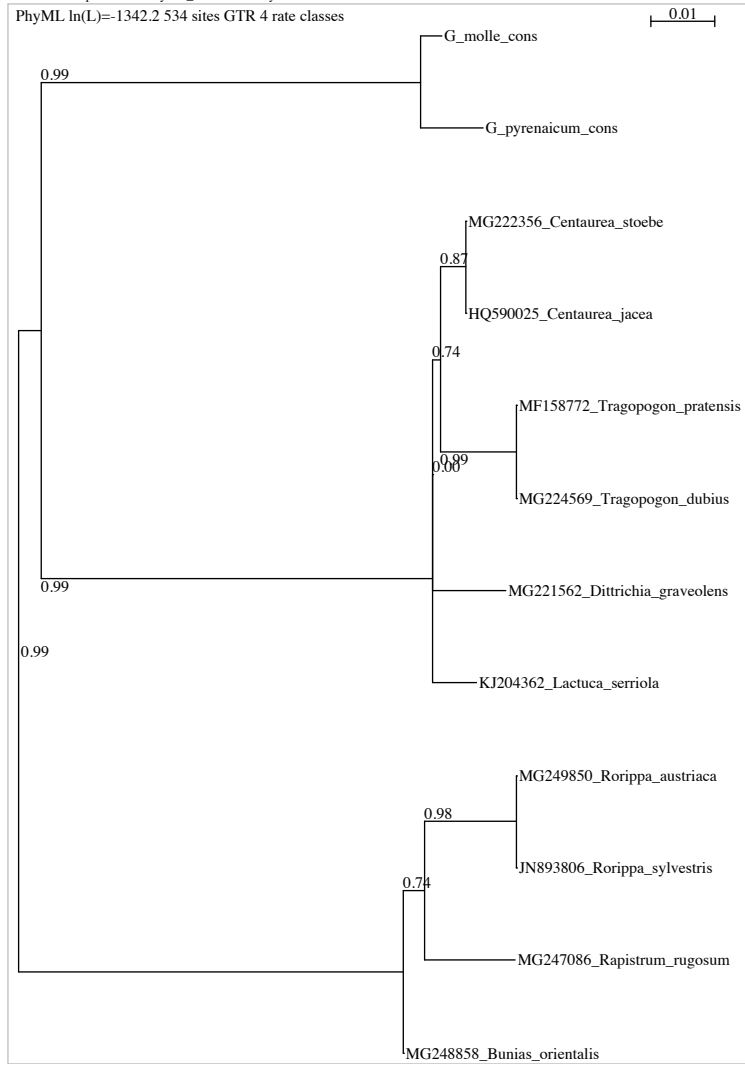

**Supplementary Figure 1:** Phylogenetic relatedness of the 11 plant species collected.

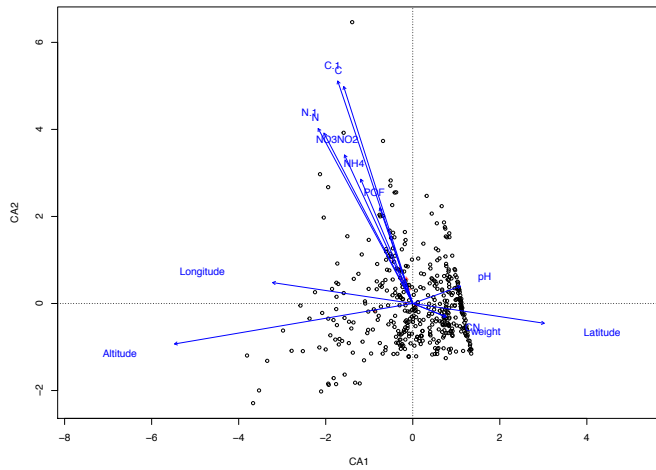

**Supplementary Figure 2:** Canonical Correspondence Analysis (CCA) of soil edaphic factors.

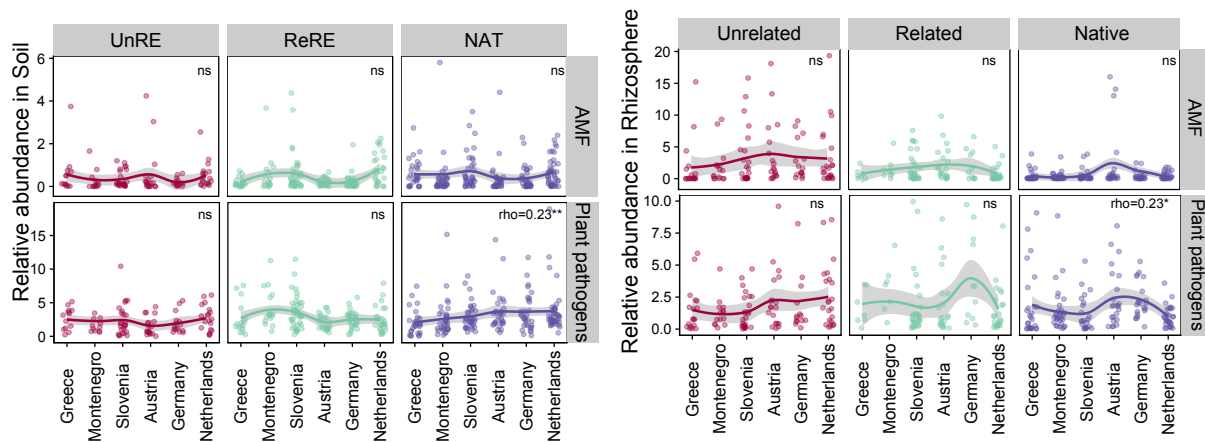

**Supplementary Figure 3:** Relative abundance of potential AMF and plant pathogens across the latitudinal gradient of range expansion in the (A) soil and (B) rhizosphere. While no significant trends were observed under either unrelated (red) or related (green) range-expanders, native plants (purple) experienced an increase in plant pathogens.
